# Supplementary material for: Promoting nitrate electroreduction to ammonia over A-site deficient cobalt-based perovskite oxides
Source: Royal Society of Chemistry journal article supplement (doi:10.1039/d3ta01063e), 2023-01-01
Supplement: d3ta01063e1.pdf [file d3ta01063e1.pdf]

*Article to Journal of Materials Chemistry A*

## Supporting Information

### **Promoting Nitrate Electroreduction to Ammonia over A-site Deficient Cobalt-based Perovskite Oxides**

Fulong Liu<sup>1,#</sup>, Zhenbao Zhang<sup>2,#</sup>, Lei Shi<sup>3</sup>, Yu Zhang<sup>4</sup>, Xiaoyu Qiu<sup>5</sup>, Yuming Dong<sup>1,\*</sup>,  
Heqing Jiang<sup>4</sup>, Yongfa Zhu<sup>6,\*</sup>, Jiawei Zhu<sup>1,4,\*</sup>

<sup>1</sup>Key Laboratory of Synthetic and Biological Colloids, Ministry of Education, School of Chemical and Material Engineering, Jiangnan University, Wuxi 214122, China

<sup>2</sup>School of Chemistry and Chemical Engineering, Linyi University, Linyi 276005, China

<sup>3</sup>College of Materials Science and Engineering, Nanjing Forestry University, Nanjing 210037, China

<sup>4</sup>Qingdao Institute of Bioenergy and Bioprocess Technology, Chinese Academy of Sciences, Qingdao 266101, China

<sup>5</sup>School of Chemistry and Materials Science, Nanjing Normal University, Nanjing 210023, China

<sup>6</sup>Department of Chemistry, Tsinghua University, Beijing 100084, China

<sup>#</sup>These authors contributed equally to this work.

\*Email: [dongym@jiangnan.edu.cn](mailto:dongym@jiangnan.edu.cn), [zhuyf@mail.tsinghua.edu.cn](mailto:zhuyf@mail.tsinghua.edu.cn), [jwzhu@qibebt.ac.cn](mailto:jwzhu@qibebt.ac.cn)

## 1 Experimental details

**Chemicals and Materials.** Barium nitrate ( $\text{Ba}(\text{NO}_3)_2$ , 99.5%), strontium nitrate ( $\text{Sr}(\text{NO}_3)_2$ , 99.5%), ammonium hydroxide ( $\text{NH}_3 \cdot \text{H}_2\text{O}$ , 25-28%), ethanol ( $\text{C}_2\text{H}_6\text{O}$ , 99.7%), isopropanol ( $\text{C}_3\text{H}_8\text{O}$ , 99.7%), potassium nitrate ( $\text{KNO}_3$ , 99.0%), potassium sulfate ( $\text{K}_2\text{SO}_4$ , 99.0%), solution of sodium hypochlorite ( $\text{NaClO}$ , available chlorine  $\geq 5.2\%$ ), ammonia chloride ( $\text{NH}_4\text{Cl}$ , 99.5%), trisodium citrate dihydrate ( $\text{C}_6\text{H}_5\text{Na}_3\text{O}_7$ , 99.0%), salicylic acid ( $\text{C}_7\text{H}_6\text{O}_3$ , 99.5%), sodium thiosulfate ( $\text{Na}_2\text{S}_2\text{O}_3$ , AR), soluble starch from potato ( $(\text{C}_6\text{H}_{10}\text{O}_5)_n$ , AR), potassium iodide (KI, 99.0%), hydrochloric acid ( $\text{HCl}$ , 36-38%), sodium hydrate ( $\text{NaOH}$ , AR), and sulphuric acid ( $\text{H}_2\text{SO}_4$ , 70%) were purchased from Sinopharm Chemical Reagent. Cobalt nitrate hexahydrate ( $\text{Co}(\text{NO}_3)_2 \cdot 6\text{H}_2\text{O}$ , 99.99%), ferric nitrate nonahydrate ( $\text{Fe}(\text{NO}_3)_3 \cdot 9\text{H}_2\text{O}$ , AR), and potassium nitrate-15N ( $\text{K}^{15}\text{NO}_3$ , 99 atom%) were purchased from Shanghai Macklin Biochemical. Ethylenediaminetetraacetic acid (EDTA, 99.0%), and citric acid (CA, 99.5%) were purchased from Shanghai Greagent. Sodium nitroferricyanide dihydrate ( $\text{C}_5\text{FeN}_6\text{Na}_2\text{O} \cdot 2\text{H}_2\text{O}$ , 99.0%), and dimethyl sulfoxide (DMSO-d<sub>6</sub>, 99.9%) were purchased from Shanghai Aladdin Biochemical Technology. Maleic acid ( $\text{C}_4\text{H}_4\text{O}_4$ , 99.0%) was purchased from Amethyst. Nafion solution (5 wt%) was purchased from Alfa Aesar. Nafion 117 Proton exchange membrane was purchased from Dupont. Carbon black (ECP600JD) was purchased from Japan Lion. Deionized water ( $18.2 \text{ M}\Omega \cdot \text{cm}^{-1}$ ) at room temperature was used to prepare all the aqueous solutions. All chemical reagents were used as received without further purification.

**Preparation of catalysts.** The A-site cation defective ( $\text{Ba}_{0.5}\text{Sr}_{0.5}$ )<sub>1-x</sub>Co<sub>0.8</sub>Fe<sub>0.2</sub>O<sub>3- $\delta$</sub>  ( $x=0, 0.05, 0.10, 0.15, \text{ and } 0.20$ , denoted as (BS)<sub>1-x</sub>CF), were prepared by a typical sol-gel method. Firstly, stoichiometric mass of  $\text{Ba}(\text{NO}_3)_2$ ,  $\text{Sr}(\text{NO}_3)_2$ ,  $\text{Co}(\text{NO}_3)_2 \cdot 6\text{H}_2\text{O}$ , and  $\text{Fe}(\text{NO}_3)_3 \cdot 9\text{H}_2\text{O}$  were dissolved in deionized water to obtain the precursor solution. Then a certain amount of EDTA-ammonium hydroxide mixture and CA were added sequentially to the precursor solution as complexing agents, and the molar ratio of total metal ions, EDTA, CA, and ammonium hydroxide was 1:1:2:10. To ensure the complexation was complete, an appropriate amount of ammonium

hydroxide was added to the mixed solution and the pH of the solution was adjusted to 7. The precursor solution was continuously magnetic stirred and heated at 90 °C for 8 h to form a transparent precursor gel. Then the precursor gel was heated at 200 °C for 5 h to obtain the solid precursor. Finally, the solid precursors were calcined in air at 950 °C for 5 h to yield pure phase perovskite-type samples. In order to make the samples more easily dispersed, the catalyst particles were mixed with ethanol and ball milled at 675 rpm·min<sup>-1</sup> for 5 h. The ball-milled sample was removed and dried to get the catalyst powder with uniform particle size. Therefore, BSCF, (BS)<sub>0.95</sub>CF, (BS)<sub>0.90</sub>CF, (BS)<sub>0.85</sub>CF and (BS)<sub>0.80</sub>CF were successfully synthesized, respectively.

**Preparation of electrode.** Typically, 100 μL of Nafion solution (5 wt%) and 8 mg of mixed samples (catalyst: carbon = 1:1) were dispersed in 1900 μL of isopropanol by sonication for 2 h to form a homogeneous ink. Then, 10 μL of the above mixture was pipetted onto an L-shaped glassy carbon electrode (5 mm diameter) and dried under the atmosphere of infrared light for 30 min.

**Characterization.** The crystal structure of as-prepared samples were examined by room temperature X-ray diffraction (XRD, Bruker AXS, Germany D8 3 kW) and filtered Cu K $\alpha$  radiation ( $\lambda = 1.5406 \text{ \AA}$ ). The X-ray diffraction patterns were collected by step scanning in the 2-theta range of 20-80° with the intervals of 0.02°. *Rietveld* refinement analysis of the XRD patterns was carried out in order to obtain more detailed structural information. The specific surface area of the samples was characterized by a nitrogen adsorption test (Best Instrument Technology (Beijing), BSD-PS2) using the Brunauer-Emmett-Teller (BET) method. Scanning electron microscopy (SEM) images were conducted to observe the morphologies of as-prepared samples using a Hitachi S4800 microscope. Transmission electron microscopy (TEM) images were recorded on a JEM 2100plus microscope operating at 200 KV. The energy-dispersed X-ray (EDX) mapping images were performed on a JEOL ARM 300F with dual EDS detectors. X-ray photoelectron spectroscopy (XPS) measurements were carried out on each sample using an Axis supra spectrometer (Kratos Analytical) with an Al K $\alpha$  microfused monochromatic light source. The binding energies were calibrated to an adventitious C 1s peak at 284.8 eV. The

room-temperature oxygen vacancy concentration of as-synthesized samples was determined by iodometric titration. For a typical procedure, 0.1 g of sample powder was dissolved in HCl aqueous solution under nitrogen protection to prevent the oxidation of I<sup>-</sup> ions (from KI) by air. A few drops of starch solution were added as a titration indicator. Then, the Na<sub>2</sub>S<sub>2</sub>O<sub>3</sub> solution was slowly dripped into the above mixture until the end point of titration. The oxygen vacancy concentration at room temperature was calculated based on the amount of sodium thiosulfate solution.

**Electrochemical measurements.** Electrochemical measurements were performed in an H-type electrolytic cell separated by Nafion 117 Proton membrane, and the electrochemical data were recorded by a CS 2350M electrochemical workstation (Wuhan Corrtest). For a typical three-electrode system, Ag/AgCl (3 M KCl) electrode and platinum plate (1×1 cm<sup>2</sup>) were used as the reference and counter electrode, respectively, and catalyst ink was applied dropwise to the glassy carbon electrode as the working electrode. A mixed electrolyte of 0.5 M KNO<sub>3</sub>/0.1 M K<sub>2</sub>SO<sub>4</sub> (50 mL) was equally distributed to the cathode and anode chambers. All potentials were recorded on the reversible hydrogen electrode ( $E_{\text{RHE}} = E_{\text{Ag/AgCl}} + 0.222 + 0.0591 \text{ V} \times \text{pH}$ ), and then iR compensation (90%) was performed for all potentials. Prior to the nitrate electroreduction test, the electrolyte was purged with high purity Ar for 30 min. The cyclic voltammetry (CV) curves were conducted until the polarization curve reached steady state at a scan rate of 50 mV·s<sup>-1</sup>, and then the linear sweep voltammetry (LSV) curves were performed at a scan rate of 5 mV·s<sup>-1</sup>. Next, constant potential polarization tests were performed at different potentials for 0.5 h, and the produced NH<sub>3</sub> was analyzed by ultraviolet-visible (UV-vis) spectrophotometer and/or <sup>1</sup>H nuclear magnetic resonance (NMR, 400 MHz) spectroscopy. The electrochemical active surface area (ECSA) of the catalysts was evaluated using electrochemical double-layer capacitance values (C<sub>dl</sub>). CV curves were performed over the non-faradaic region at scan rates of 5, 10, 20, 40, 70, and 100 mV·s<sup>-1</sup>, respectively, and the C<sub>dl</sub> values were obtained from the linear relationship between the current density difference at a given potential and the scan rate. The electrochemical impedance spectra (EIS) were measured at -0.5 V (vs. RHE) from 0.1 Hz to 100 KHz.

**Determination of ammonia.** Concentration of produced  $\text{NH}_3$  was quantified spectrophotometrically by the indophenol blue method with modification.<sup>1</sup> Firstly, a certain amount of the reacted electrolyte was removed and diluted to 2 mL. Then, 2 mL of 1 M sodium hydroxide solution containing 5% salicylic acid and 5% sodium citrate, 1 mL of 0.05 M sodium hypochlorite and 0.2 mL of 1.0 wt% sodium nitroferricyanide solution were added. After incubation for 2 h at room temperature, the absorption spectra were measured by UV-vis. The formation of indophenol blue was measured by absorbance at 655 nm. The concentration-absorbance curves were plotted using a series of standard ammonium chloride solutions.

**NMR determination of ammonia.** The amount of produced  $\text{NH}_3$  was also determined by  $^1\text{H}$  NMR. 2 mL of the reacted electrolyte was firstly removed from the cathode chamber and neutralized by  $\text{H}_2\text{SO}_4$  aqueous solution (2 mL, 1 M). After that, the neutralized electrolyte (30  $\mu\text{L}$ ) was mixed with maleic acid (as the internal standard, 10  $\mu\text{L}$ , 3.6 mM) aqueous solution,  $\text{H}_2\text{SO}_4$  aqueous solution (10  $\mu\text{L}$ , 4 M), and  $\text{DMSO-d}_6$  (550  $\mu\text{L}$ ). A small amount of tetramethylsilane was added as a reference. All  $^1\text{H}$  NMR experiments were performed by using pre-saturation experiments for water suppression. The concentration of  $\text{NH}_3$  can be determined by comparing the integral area (I) of the vinylic singlets for maleic acid (6.25 ppm, 2H) with the typical triplet for ammonium (7.18 ppm, 4H) based on the following equation:<sup>2</sup>

$$C_{\text{NH}_4^+} = \frac{I_{\text{NH}_4^+} / H_{\text{NH}_4^+}}{I_{\text{S}} / H_{\text{S}}} \times C_{\text{S}}$$

where  $C_{\text{NH}_4^+}$  and  $C_{\text{S}}$  are the concentrations of ammonium and maleic acid, respectively;  $H_{\text{NH}_4^+}$  and  $H_{\text{S}}$  are the number of protons for ammonium and maleic acid, respectively;  $I_{\text{NH}_4^+}$  and  $I_{\text{S}}$  are the integrals of  $^1\text{H}$  NMR peaks for ammonium and maleic acid, respectively. To further minimize experimental error, concentration-integrated area ratio curves were also plotted through a series of standard ammonium chloride solutions. To confirm that N element in  $\text{NH}_3$  was derived from the  $\text{NO}_3^-$ , we performed isotope labeling experiments in 0.1 M  $\text{K}^{15}\text{NO}_3/0.1$  M  $\text{K}_2\text{SO}_4$  electrolyte, and the produced  $^{15}\text{NH}_4^+$  was verified by  $^1\text{H}$  NMR.

**Calculations of NH<sub>3</sub> yield rate and Faradaic efficiency (FE).** The NH<sub>3</sub> yield rate was calculated using the following equation:<sup>3</sup>

$$\text{yield rate}_{\text{NH}_3} = \frac{C_{\text{NH}_3} \times V}{t \times m_{\text{cat}}}$$

The NH<sub>3</sub> Faradaic efficiency (FE) was calculated according to following equation [3]:

$$\text{FE}_{\text{NH}_3} = \frac{C_{\text{NH}_3} \times V \times 8 \times F}{M_{\text{NH}_3} \times Q}$$

where  $C_{\text{NH}_3}$  is the measured NH<sub>3</sub> concentration,  $V$  is the volume of the cathodic electrolyte,  $t$  is the reduction time,  $m_{\text{cat}}$  is the loading mass of catalysts,  $F$  is the Faraday constant ( $96485 \text{ C} \cdot \text{mol}^{-1}$ ),  $M_{\text{NH}_3}$  is the molar mass of NH<sub>3</sub>, and  $Q$  is the total charge passing the electrode.

## 2 Supplementary results

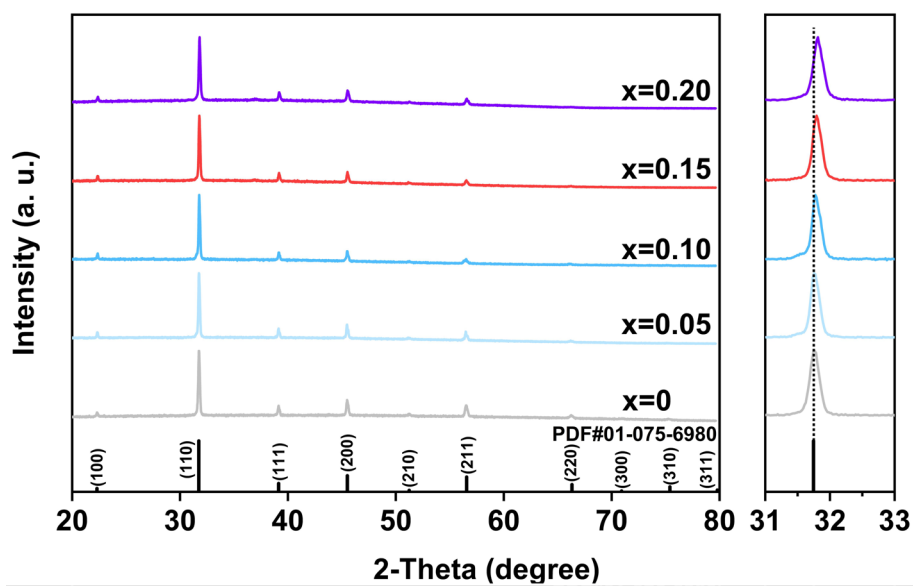

**Fig. S1** XRD patterns of the  $(BS)_{1-x}CF$  samples, with enlargements in the 2-theta ranges of 31-33°.

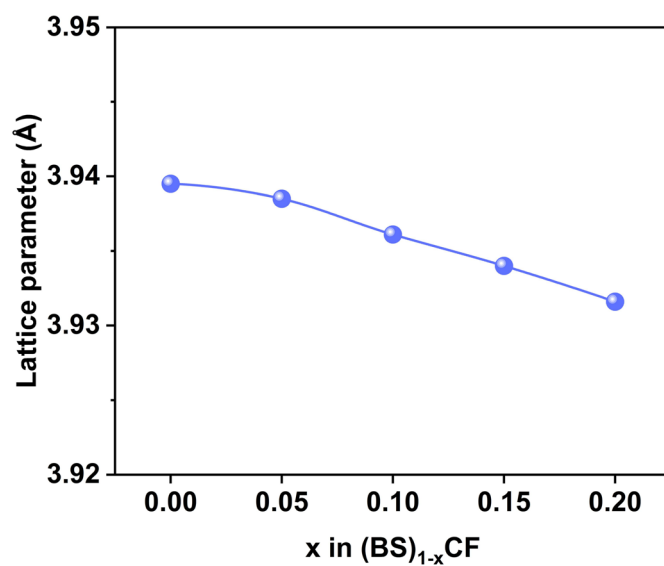

**Fig. S2** Lattice parameter of the  $(BS)_{1-x}CF$  samples.

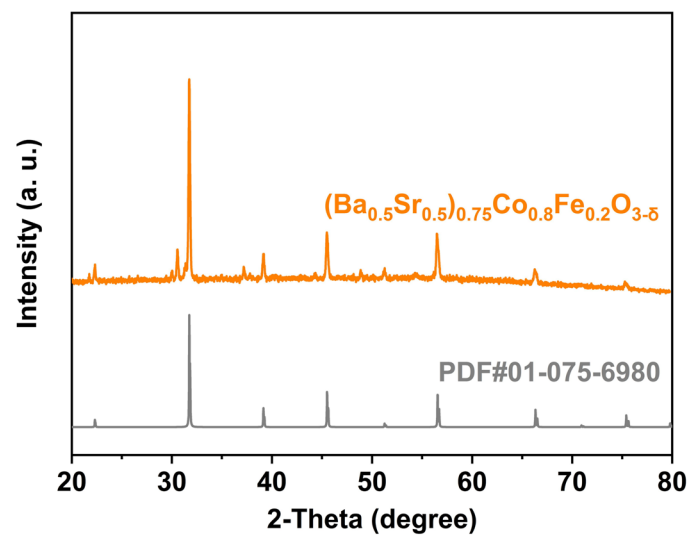

**Fig. S3** XRD pattern of the  $(\text{BS})_{0.75}\text{CF}$  sample.

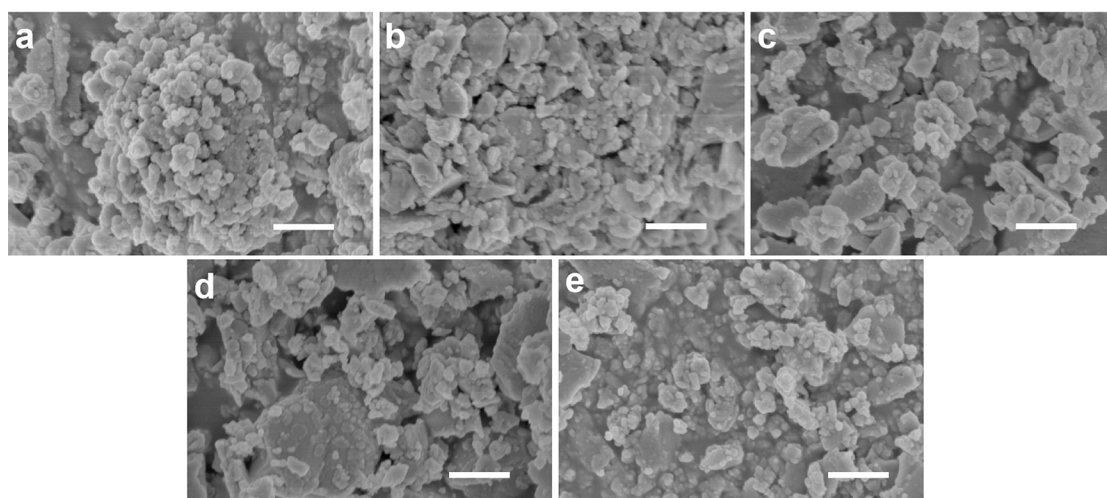

**Fig. S4** SEM images of  $(\text{BS})_{1-x}\text{CF}$  samples (Scale bar: 500 nm), (a) BSCF, (b)  $(\text{BS})_{0.95}\text{CF}$ , (c)  $(\text{BS})_{0.90}\text{CF}$ , (d)  $(\text{BS})_{0.85}\text{CF}$ , and (e)  $(\text{BS})_{0.80}\text{CF}$ .



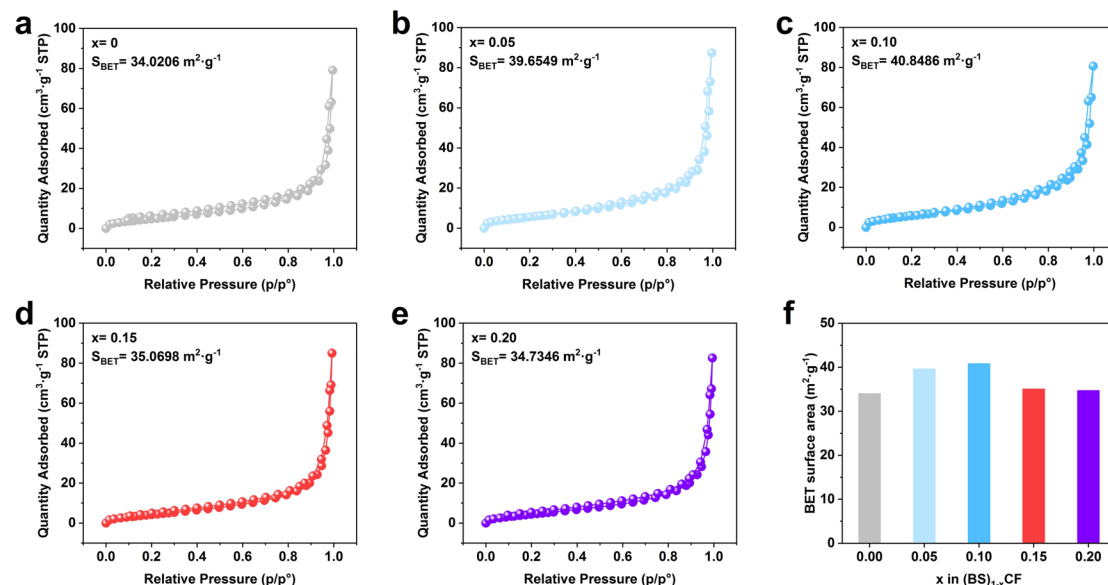

**Fig. S5** N<sub>2</sub> adsorption-desorption isotherms of (a) BSCF, (b) (BS)<sub>0.95</sub>CF, (c) (BS)<sub>0.90</sub>CF, (d) (BS)<sub>0.85</sub>CF, and (e) (BS)<sub>0.80</sub>CF. (f) BET specific surface areas of (BS)<sub>1-x</sub>CF samples.

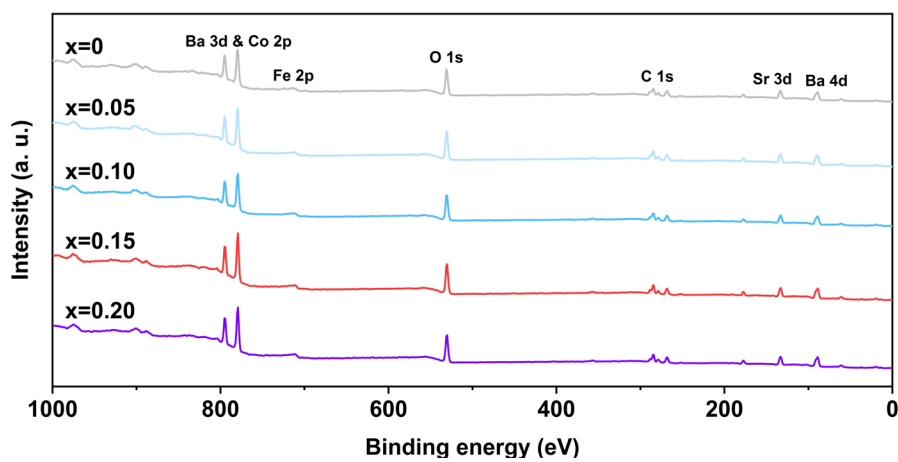

**Fig. S6** Wide-scan survey XPS spectra of (BS)<sub>1-x</sub>CF samples.

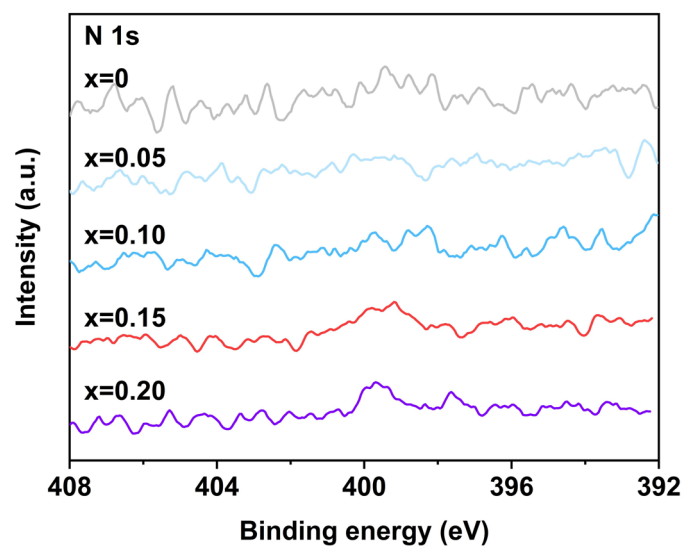

**Fig. S7** N 1s XPS spectra of  $(\text{BS})_{1-x}\text{CF}$  samples.

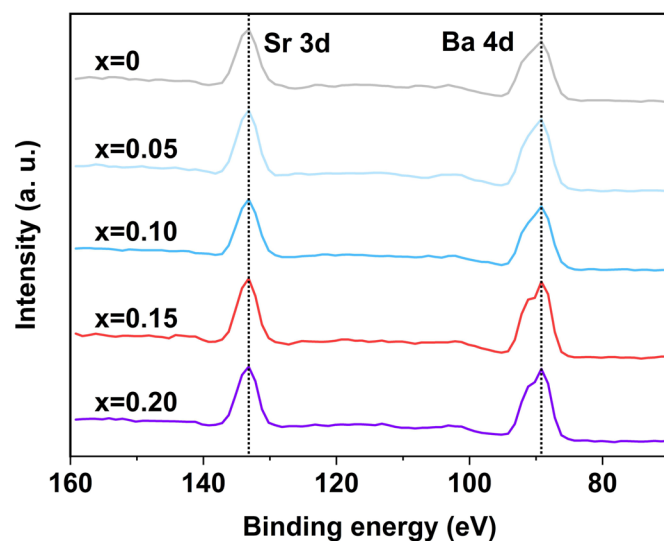

**Fig. S8** Ba 4d and Sr 3d XPS spectra of the  $(\text{BS})_{1-x}\text{CF}$  samples.

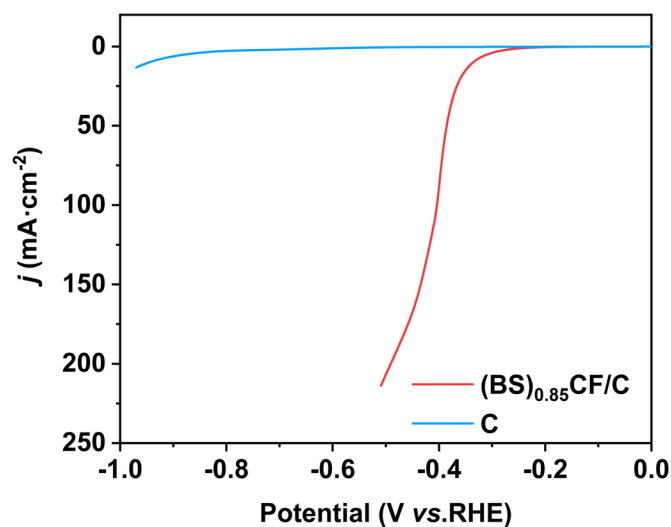

**Fig. S9** LSV curves of the  $(\text{BS})_{0.85}\text{CF/C}$  and C (Carbon) in 0.5 M  $\text{KNO}_3/0.1$  M  $\text{K}_2\text{SO}_4$  mixed electrolyte.

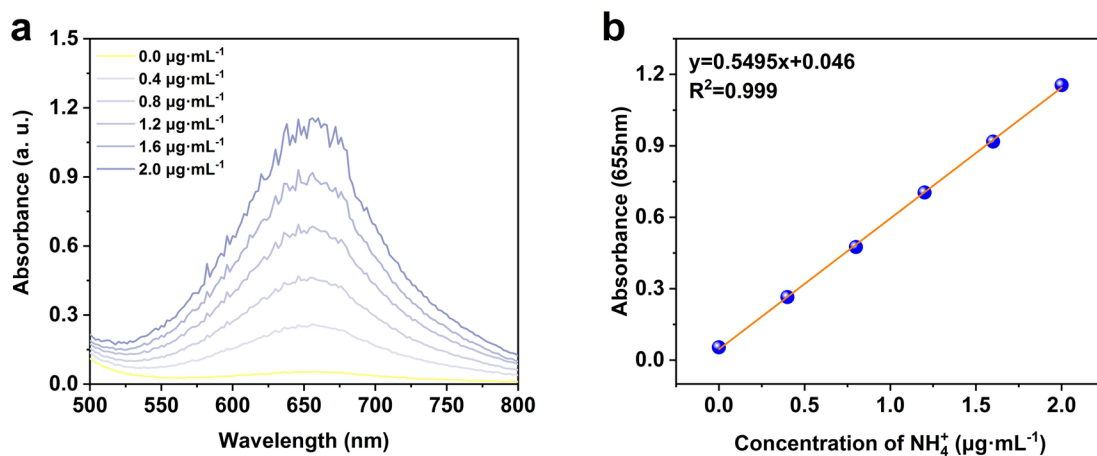

**Fig. S10** UV-vis calibration curves for the determination of  $\text{NH}_3$  in ultrapure water using a series of ammonium chloride solutions of known concentration as standards. (a) UV-vis curves of indophenol assays with  $\text{NH}_4^+$  after incubated for 2 h and (b) calibration curve used for estimation of  $\text{NH}_3$  by  $\text{NH}_4^+$  of different concentrations.

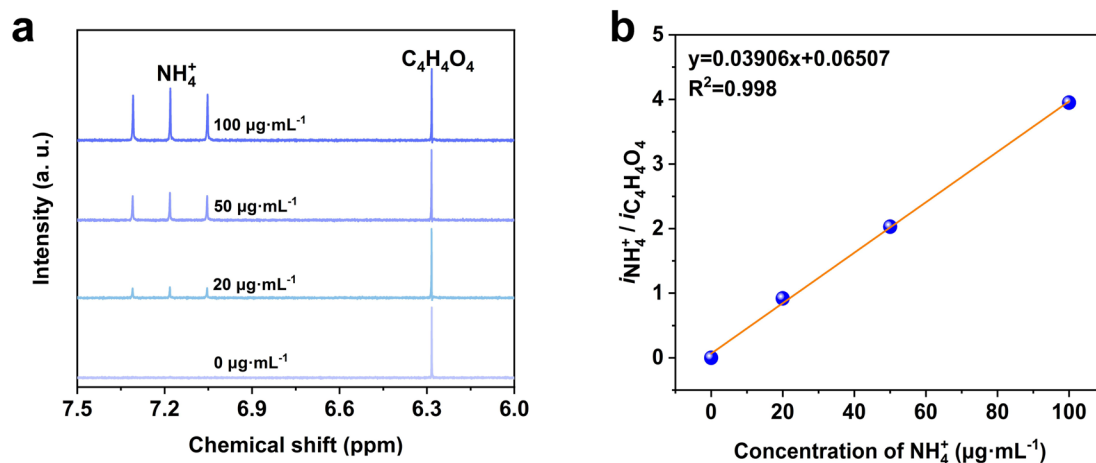

**Fig. S11** <sup>1</sup>H NMR calibration curves of NH<sub>3</sub> in 0.5 M KNO<sub>3</sub>/0.1 M K<sub>2</sub>SO<sub>4</sub> mixed electrolyte using ammonium chloride solutions of known concentration as standards. (a) <sup>1</sup>H NMR spectra of NH<sub>4</sub><sup>+</sup> using maleic acid as an internal standard and (b) calibration curve used for estimation of NH<sub>3</sub> by NH<sub>4</sub><sup>+</sup> of different concentrations.

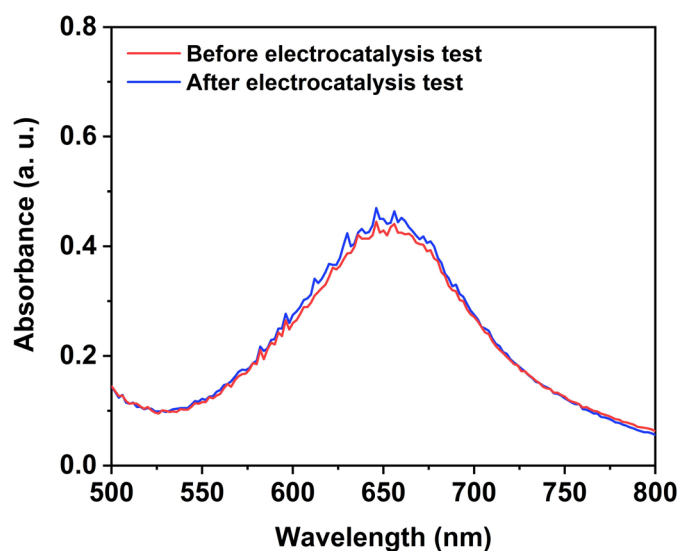

**Fig. S12** UV-vis curves of electrolytes before and after electrocatalysis test for (BS)<sub>0.85</sub>CF in a K<sub>2</sub>SO<sub>4</sub> solution without KNO<sub>3</sub>.

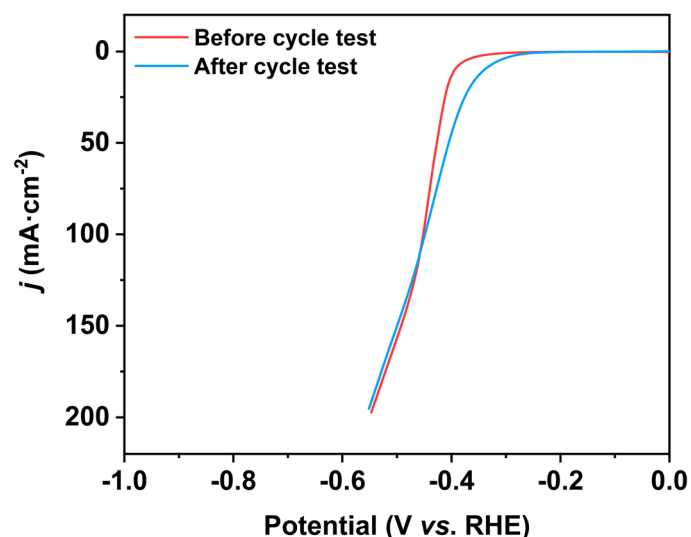

**Fig. S13** LSV curves of the (BS)<sub>0.85</sub>CF in 0.5 M KNO<sub>3</sub>/0.1 M K<sub>2</sub>SO<sub>4</sub> mixed electrolyte before and after the cycle electrolysis test.

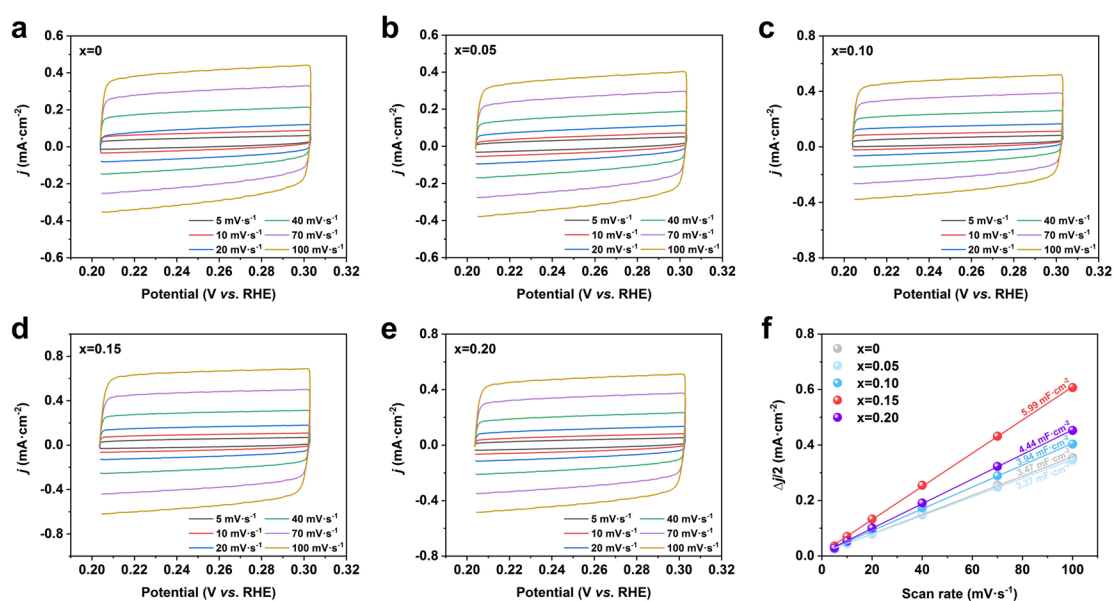

**Fig. S14** CV curves with various scan rates (5, 10, 20, 40, 70, and 100 mV·s<sup>-1</sup>) of (a) BSCF, (b) (BS)<sub>0.95</sub>CF, (c) (BS)<sub>0.90</sub>CF, (d) (BS)<sub>0.85</sub>CF, and (e) (BS)<sub>0.80</sub>CF. (f) Linear fitting curves of the current density difference against scan rates of the (BS)<sub>1-x</sub>CF catalysts.

**Table S1.** Co 2p XPS peak fitting parameters and average valence state of Fe in (BS)<sub>1-x</sub>CF samples.

BSCF/Co<sup>+3.39</sup>

| Name               | Co <sup>4+</sup> 2p <sub>1/2</sub> | Co <sup>3+</sup> 2p <sub>1/2</sub> | Co <sup>4+</sup> 2p <sub>3/2</sub> | Co <sup>3+</sup> 2p <sub>3/2</sub> |
|--------------------|------------------------------------|------------------------------------|------------------------------------|------------------------------------|
| Peak position (eV) | 795.6                              | 794.2                              | 780.4                              | 779.0                              |
| FWHM               | 0.97                               | 1.22                               | 1.27                               | 1.48                               |
| Peak area          | 8578                               | 13295                              | 17157                              | 26591                              |

(BS)<sub>0.95</sub>CF/Co<sup>+3.41</sup>

| Name               | Co <sup>4+</sup> 2p <sub>1/2</sub> | Co <sup>3+</sup> 2p <sub>1/2</sub> | Co <sup>4+</sup> 2p <sub>3/2</sub> | Co <sup>3+</sup> 2p <sub>3/2</sub> |
|--------------------|------------------------------------|------------------------------------|------------------------------------|------------------------------------|
| Peak position (eV) | 795.5                              | 794.1                              | 780.3                              | 778.9                              |
| FWHM               | 0.89                               | 1.16                               | 1.08                               | 1.39                               |
| Peak area          | 20368                              | 28690                              | 40736                              | 57380                              |

(BS)<sub>0.90</sub>CF/Co<sup>+3.41</sup>

| Name               | Co <sup>4+</sup> 2p <sub>1/2</sub> | Co <sup>3+</sup> 2p <sub>1/2</sub> | Co <sup>4+</sup> 2p <sub>3/2</sub> | Co <sup>3+</sup> 2p <sub>3/2</sub> |
|--------------------|------------------------------------|------------------------------------|------------------------------------|------------------------------------|
| Peak position (eV) | 795.5                              | 794.1                              | 780.3                              | 778.9                              |
| FWHM               | 0.94                               | 1.19                               | 1.19                               | 1.43                               |
| Peak area          | 18864                              | 26715                              | 37728                              | 53430                              |

(BS)<sub>0.85</sub>CF/Co<sup>+3.43</sup>

| Name               | Co <sup>4+</sup> 2p <sub>1/2</sub> | Co <sup>3+</sup> 2p <sub>1/2</sub> | Co <sup>4+</sup> 2p <sub>3/2</sub> | Co <sup>3+</sup> 2p <sub>3/2</sub> |
|--------------------|------------------------------------|------------------------------------|------------------------------------|------------------------------------|
| Peak position (eV) | 795.4                              | 794.1                              | 780.2                              | 778.9                              |
| FWHM               | 0.92                               | 0.99                               | 1.11                               | 1.22                               |
| Peak area          | 24411                              | 31502                              | 48823                              | 63004                              |

(BS)<sub>0.80</sub>CF/Co<sup>+3.40</sup>

| Name               | Co <sup>4+</sup> 2p <sub>1/2</sub> | Co <sup>3+</sup> 2p <sub>1/2</sub> | Co <sup>4+</sup> 2p <sub>3/2</sub> | Co <sup>3+</sup> 2p <sub>3/2</sub> |
|--------------------|------------------------------------|------------------------------------|------------------------------------|------------------------------------|
| Peak position (eV) | 795.4                              | 794.1                              | 780.2                              | 778.9                              |
| FWHM               | 0.96                               | 1.01                               | 1.14                               | 1.24                               |
| Peak area          | 20904                              | 30759                              | 41809                              | 61519                              |

**Table S2.** Fe 2p XPS peak fitting parameters and average valence state of Fe in (BS)<sub>1-x</sub>CF samples.

BSCF/Fe<sup>+2.50</sup>

| Name               | Fe <sup>3+</sup> 2p <sub>1/2</sub> | Fe <sup>2+</sup> 2p <sub>1/2</sub> | Fe <sup>3+</sup> 2p <sub>3/2</sub> | Fe <sup>2+</sup> 2p <sub>3/2</sub> |
|--------------------|------------------------------------|------------------------------------|------------------------------------|------------------------------------|
| Peak position (eV) | 725.1                              | 722.9                              | 711.7                              | 709.5                              |
| FWHM               | 4.00                               | 3.37                               | 3.27                               | 2.6                                |
| Peak area          | 1048                               | 1021                               | 2097                               | 2043                               |

(BS)<sub>0.95</sub>CF/Fe<sup>+2.47</sup>

| Name               | Fe <sup>3+</sup> 2p <sub>1/2</sub> | Fe <sup>2+</sup> 2p <sub>1/2</sub> | Fe <sup>3+</sup> 2p <sub>3/2</sub> | Fe <sup>2+</sup> 2p <sub>3/2</sub> |
|--------------------|------------------------------------|------------------------------------|------------------------------------|------------------------------------|
| Peak position (eV) | 724.9                              | 722.9                              | 711.5                              | 709.5                              |
| FWHM               | 4.00                               | 3.10                               | 3.16                               | 2.60                               |
| Peak area          | 2270                               | 2491                               | 4541                               | 4982                               |

(BS)<sub>0.90</sub>CF/Fe<sup>+2.48</sup>

| Name               | Fe <sup>3+</sup> 2p <sub>1/2</sub> | Fe <sup>2+</sup> 2p <sub>1/2</sub> | Fe <sup>3+</sup> 2p <sub>3/2</sub> | Fe <sup>2+</sup> 2p <sub>3/2</sub> |
|--------------------|------------------------------------|------------------------------------|------------------------------------|------------------------------------|
| Peak position (eV) | 724.9                              | 722.9                              | 711.5                              | 709.5                              |
| FWHM               | 4.00                               | 3.16                               | 2.98                               | 2.69                               |
| Peak area          | 1998                               | 2131                               | 3997                               | 4262                               |

(BS)<sub>0.85</sub>CF/Fe<sup>+2.48</sup>

| Name               | Fe <sup>3+</sup> 2p <sub>1/2</sub> | Fe <sup>2+</sup> 2p <sub>1/2</sub> | Fe <sup>3+</sup> 2p <sub>3/2</sub> | Fe <sup>2+</sup> 2p <sub>3/2</sub> |
|--------------------|------------------------------------|------------------------------------|------------------------------------|------------------------------------|
| Peak position (eV) | 724.9                              | 723.1                              | 711.5                              | 709.7                              |
| FWHM               | 4.00                               | 3.32                               | 3.29                               | 2.83                               |
| Peak area          | 2697                               | 2884                               | 5394                               | 5769                               |

(BS)<sub>0.80</sub>CF/Fe<sup>+2.49</sup>

| Name               | Fe <sup>3+</sup> 2p <sub>1/2</sub> | Fe <sup>2+</sup> 2p <sub>1/2</sub> | Fe <sup>3+</sup> 2p <sub>3/2</sub> | Fe <sup>2+</sup> 2p <sub>3/2</sub> |
|--------------------|------------------------------------|------------------------------------|------------------------------------|------------------------------------|
| Peak position (eV) | 724.9                              | 723.0                              | 711.5                              | 709.6                              |
| FWHM               | 4.00                               | 3.52                               | 3.37                               | 2.89                               |
| Peak area          | 2762                               | 2783                               | 5525                               | 5567                               |

**Table S3.** The B-site average valence states and oxygen vacancy ( $\delta$ ) of the  $(\text{Ba}_{0.5}\text{Sr}_{0.5})_{1-x}\text{Co}_{0.8}\text{Fe}_{0.2}\text{O}_{3-\delta}$  ( $(\text{BS})_{1-x}\text{CF}$ ) obtained by iodometric titration.

| Sample                        |         | B-site average valence states | Oxygen vacancy/ $\delta$ |
|-------------------------------|---------|-------------------------------|--------------------------|
| BSCF                          | 1       | 2.837                         | 0.581                    |
|                               | 2       | 2.892                         | 0.553                    |
|                               | 3       | 2.805                         | 0.597                    |
|                               | Average | 2.844                         | 0.577                    |
| $(\text{BS})_{0.95}\text{CF}$ | 1       | 2.807                         | 0.646                    |
|                               | 2       | 2.759                         | 0.670                    |
|                               | 3       | 2.860                         | 0.619                    |
|                               | Average | 2.808                         | 0.645                    |
| $(\text{BS})_{0.90}\text{CF}$ | 1       | 2.836                         | 0.681                    |
|                               | 2       | 2.784                         | 0.707                    |
|                               | 3       | 2.837                         | 0.681                    |
|                               | Average | 2.819                         | 0.689                    |
| $(\text{BS})_{0.85}\text{CF}$ | 1       | 2.843                         | 0.728                    |
|                               | 2       | 2.844                         | 0.727                    |
|                               | 3       | 2.828                         | 0.735                    |
|                               | Average | 2.838                         | 0.730                    |
| $(\text{BS})_{0.80}\text{CF}$ | 1       | 2.825                         | 0.787                    |
|                               | 2       | 2.860                         | 0.769                    |
|                               | 3       | 2.862                         | 0.768                    |
|                               | Average | 2.849                         | 0.774                    |



**Table S4.** O 1s XPS peak fitting parameters and the concentration of oxygen vacancies on (BS)<sub>1-x</sub>CF surfaces.

BSCF (O<sub>2</sub><sup>2-</sup>/O<sup>-</sup>)% = 38.0%

| Name               | Adsorbed H <sub>2</sub> O | Adsorbed O <sub>2</sub> / <sup>-</sup> OH | O <sub>2</sub> <sup>2-</sup> /O <sup>-</sup> | Lattice O <sup>2-</sup> |
|--------------------|---------------------------|-------------------------------------------|----------------------------------------------|-------------------------|
| Peak position (eV) | 532.8                     | 530.9                                     | 529.4                                        | 528.6                   |
| FWHM               | 1.84                      | 1.73                                      | 1.27                                         | 1.79                    |
| Peak area          | 4171                      | 35424                                     | 2459                                         | 3996                    |

(BS)<sub>0.95</sub>CF (O<sub>2</sub><sup>2-</sup>/O<sup>-</sup>)% = 39.9%

| Name               | Adsorbed H <sub>2</sub> O | Adsorbed O <sub>2</sub> / <sup>-</sup> OH | O <sub>2</sub> <sup>2-</sup> /O <sup>-</sup> | Lattice O <sup>2-</sup> |
|--------------------|---------------------------|-------------------------------------------|----------------------------------------------|-------------------------|
| Peak position (eV) | 532.8                     | 530.9                                     | 529.4                                        | 528.7                   |
| FWHM               | 1.83                      | 1.62                                      | 1.22                                         | 1.58                    |
| Peak area          | 9276                      | 77404                                     | 6217                                         | 9352                    |

(BS)<sub>0.90</sub>CF (O<sub>2</sub><sup>2-</sup>/O<sup>-</sup>)% = 49.6%

| Name               | Adsorbed H <sub>2</sub> O | Adsorbed O <sub>2</sub> / <sup>-</sup> OH | O <sub>2</sub> <sup>2-</sup> /O <sup>-</sup> | Lattice O <sup>2-</sup> |
|--------------------|---------------------------|-------------------------------------------|----------------------------------------------|-------------------------|
| Peak position (eV) | 532.9                     | 530.9                                     | 529.4                                        | 528.6                   |
| FWHM               | 1.70                      | 1.71                                      | 1.18                                         | 1.47                    |
| Peak area          | 7442                      | 72593                                     | 6650                                         | 6741                    |

(BS)<sub>0.85</sub>CF (O<sub>2</sub><sup>2-</sup>/O<sup>-</sup>)% = 53.4%

| Name               | Adsorbed H <sub>2</sub> O | Adsorbed O <sub>2</sub> / <sup>-</sup> OH | O <sub>2</sub> <sup>2-</sup> /O <sup>-</sup> | Lattice O <sup>2-</sup> |
|--------------------|---------------------------|-------------------------------------------|----------------------------------------------|-------------------------|
| Peak position (eV) | 532.8                     | 530.9                                     | 529.4                                        | 528.7                   |
| FWHM               | 1.77                      | 1.59                                      | 1.17                                         | 1.52                    |
| Peak area          | 8260                      | 77815                                     | 9585                                         | 8363                    |

(BS)<sub>0.80</sub>CF (O<sub>2</sub><sup>2-</sup>/O<sup>-</sup>)% = 55.1%

| Name               | Adsorbed H <sub>2</sub> O | Adsorbed O <sub>2</sub> / <sup>-</sup> OH | O <sub>2</sub> <sup>2-</sup> /O <sup>-</sup> | Lattice O <sup>2-</sup> |
|--------------------|---------------------------|-------------------------------------------|----------------------------------------------|-------------------------|
| Peak position (eV) | 532.9                     | 530.9                                     | 529.4                                        | 528.7                   |
| FWHM               | 1.71                      | 1.59                                      | 1.25                                         | 1.67                    |
| Peak area          | 7382                      | 70280                                     | 10300                                        | 8391                    |

**Table S5.** The comparison of the electrocatalytic performance of (BS)<sub>0.85</sub>CF with other state-of-the-art NO<sub>3</sub>ER catalysts.

| Catalyst                         | Electrolyte                                                      | Potential           | FE   | NH <sub>3</sub> Yield rate                             |                                         | Re |
|----------------------------------|------------------------------------------------------------------|---------------------|------|--------------------------------------------------------|-----------------------------------------|----|
|                                  |                                                                  | (V vs. RHE)         | (%)  | (mg·h <sup>-1</sup> ·mg <sub>cat</sub> <sup>-1</sup> ) | (mg·h <sup>-1</sup> ·cm <sup>-2</sup> ) |    |
| Fe SAC                           | 0.1 M K <sub>2</sub> SO <sub>4</sub> , 0.5 M KNO <sub>3</sub>    | -0.66               | ~75  | ~20                                                    | 7.82                                    | 3  |
| FeMo-N-C                         | 0.05 M PBS, 0.16 M KNO <sub>3</sub>                              | -0.45               | 94.0 | 0.15                                                   | 0.31                                    | 4  |
| Cu Nanodisks                     | 0.1 M KOH, 0.01 M KNO <sub>3</sub>                               | -0.5                | 81.1 | 2.16                                                   |                                         | 5  |
| Bi Nanocrystals                  | 1.0 M KOH, 0.5 M KNO <sub>3</sub>                                | -0.5                | 90.6 | 46.5                                                   |                                         | 6  |
| Pd-Cu <sub>2</sub> O             | 0.5 M Na <sub>2</sub> SO <sub>4</sub> , 50 ppm NaNO <sub>3</sub> | -1.3<br>(V vs. SCE) | 96.5 | 0.92                                                   |                                         | 7  |
| CuPd                             | 1 M KOH, 1 M KNO <sub>3</sub>                                    | -0.6                | 92.5 | 106.2                                                  |                                         | 8  |
| TiO <sub>2-x</sub>               | 0.5 M Na <sub>2</sub> SO <sub>4</sub> , 50 ppm NaNO <sub>3</sub> | -1.6<br>(V vs. SCE) | 85.0 | 0.76                                                   |                                         | 9  |
| Cu Nanosheets                    | 0.1 M KOH, 10 mM KNO <sub>3</sub>                                | -0.15               | 99.7 | 0.39                                                   |                                         | 10 |
| La <sub>2</sub> CuO <sub>4</sub> | 0.5 M Na <sub>2</sub> SO <sub>4</sub> , 50 ppm NaNO <sub>3</sub> | -0.68               | 75.3 | 1.18                                                   |                                         | 11 |
| Ni <sub>3</sub> N                | 0.5 M Na <sub>2</sub> SO <sub>4</sub> , 0.05 M NaNO <sub>3</sub> | -0.85               | 89.5 | 11.7                                                   | 4.71                                    | 12 |
| Ru Nanoclusters                  | 1 M KOH, 1 M KNO <sub>3</sub>                                    | -0.2                | ~100 | 94.5                                                   | 19.9                                    | 13 |
| Pd Nanocrystalline               | 0.1 M Na <sub>2</sub> SO <sub>4</sub> , 0.1 M NaNO <sub>3</sub>  | -0.7                | 79.9 | 46.5                                                   | 9.32                                    | 14 |
| Cu-O <sub>v</sub> -W             | 0.5 M Na <sub>2</sub> SO <sub>4</sub> ,                          | -0.7                | 94.6 | 5.84                                                   |                                         | 15 |

|                                     |                                                                                     |              |             |              |             |                      |
|-------------------------------------|-------------------------------------------------------------------------------------|--------------|-------------|--------------|-------------|----------------------|
|                                     | 0.05 M NaNO <sub>3</sub>                                                            |              |             |              |             |                      |
| Zr-MOFs                             | 0.1 M Na <sub>2</sub> SO <sub>4</sub> ,<br>500 ppm NaNO <sub>3</sub>                | -1.3         | 58.1        | 4.88         |             | 16                   |
| O-Cu-PTCDA                          | 0.1 M PBS, 500<br>ppm NO <sub>3</sub> -N                                            | -0.4         | 85.9        | 0.43         |             | 17                   |
| Co <sub>3</sub> O <sub>4</sub> @NiO | 0.5 M Na <sub>2</sub> SO <sub>4</sub> ,<br>200 ppm NaNO <sub>3</sub>                | -0.7         | 54.9        | 0.12         |             | 18                   |
| BiFeO <sub>3</sub>                  | 0.1 M KOH, 0.1<br>M KNO <sub>3</sub>                                                | -0.6         | 96.8        | 90.4         |             | 19                   |
| 1-Cu                                | 0.5 M Na <sub>2</sub> SO <sub>4</sub> , 5<br>mM NaNO <sub>3</sub>                   | -0.9         | 85.5        | 53.4         | 1.12        | 20                   |
| PdN                                 | 0.1 M Na <sub>2</sub> SO <sub>4</sub> , 5<br>mM NaNO <sub>3</sub>                   | -0.7         | 96.1        | 3.76         |             | 21                   |
| Cu/Pd/CuO <sub>x</sub>              | 0.5 M K <sub>2</sub> SO <sub>4</sub> , 50<br>mg L <sup>-1</sup> KNO <sub>3</sub> -N | -1.3         | 84.0        | 1.51         |             | 22                   |
|                                     |                                                                                     | (V vs. SCE)  |             |              |             |                      |
| Fe SAC                              | 0.5 M KNO <sub>3</sub> , 0.1<br>M K <sub>2</sub> SO <sub>4</sub>                    | -0.68        | ~92         | 46.0         |             | 23                   |
| CuFe <sub>2</sub> O <sub>4</sub>    | 0.1 M PBS, 0.1 M<br>NO <sub>3</sub> <sup>-</sup>                                    | -1.0         | 91.1        | 9.21         |             | 24                   |
| Fe/CoP                              | 1 M KOH, 50<br>mM KNO <sub>3</sub>                                                  | -0.25        | 93.3        | 27.6         |             | 25                   |
| PPy-Cu                              | 0.4 M K <sub>2</sub> SO <sub>4</sub> , 0.2<br>M KNO <sub>3</sub>                    | -0.61        | 91.9        | 9.99         |             | 26                   |
| La <sub>x</sub> FeO <sub>3-δ</sub>  | 0.1 M Na <sub>2</sub> SO <sub>4</sub> ,<br>0.1 M NaNO <sub>3</sub>                  | -0.8         | 78.1        |              | 1.02        | 27                   |
| <b>(BS)<sub>0.85</sub>CF</b>        | <b>0.1 M K<sub>2</sub>SO<sub>4</sub>, 0.5<br/>M KNO<sub>3</sub></b>                 | <b>-0.45</b> | <b>97.9</b> | <b>143.3</b> | <b>14.6</b> | <b>This<br/>work</b> |

## References

1. D. Zhu, L. Zhang, R. E. Ruther and R. J. Hamers, *Nat Mater*, 2013, **12**, 836-841.
2. Z. Fang, Z. Jin, S. Tang, P. Li, P. Wu and G. Yu, *ACS Nano*, 2022, **16**, 1072–1081
3. E. Murphy, Y. Liu, I. Matanovic, S. Guo, P. Tieu, Y. Huang, A. Ly, S. Das, I. Zenyuk, X. Pan, E. Spoeerke and P. Atanassov, *ACS Catal*, 2022, **12**, 6651-6662.
4. K. Wu, C. Sun, Z. Wang, Q. Song, X. Bai, X. Yu, Q. Li, Z. Wang, H. Zhang, J. Zhang, X. Tong, Y. Liang, A. Khosla and Z. Zhao, *ACS Mater Lett*, 2022, **4**, 650-656.
5. N. Zhang, J. Shang, X. Deng, L. Cai, R. Long, Y. Xiong and Y. Chai, *ACS Nano*, 2022, **16**, 4795-4804.
6. Y. Xu, K. Ren, T. Ren, M. Wang, Z. Wang, X. Li, L. Wang and H. Wang, *Appl Catal B Environ*, 2022, **306**, 121094.
7. Q. Gao, H. S. Pillai, Y. Huang, S. Liu, Q. Mu, X. Han, Z. Yan, H. Zhou, Q. He, H. Xin and H. Zhu, *Nat Commun*, 2022, **13**, 2338.
8. R. Jia, Y. Wang, C. Wang, Y. Ling, Y. Yu and B. Zhang, *ACS Catal*, 2020, **10**, 3533-3540.
9. X. Fu, X. Zhao, X. Hu, K. He, Y. Yu, T. Li, Q. Tu, X. Qian, Q. Yue, M. R. Wasielewski and Y. Kang, *Appl Mater Today*, 2020, **19**, 100620.
10. Z. Gong, W. Zhong, Z. He, C. Jia, D. Zhou, N. Zhang, X. Kang and Y. Chen, *Catal Today*, 2022, **402**, 259-265.
11. X. Zhang, G. Ma, L. Shui, G. Zhou and X. Wang, *Chem Eng J*, 2022, **430**, 132666.
12. J. Li, G. Zhan, J. Yang, F. Quan, C. Mao, Y. Liu, B. Wang, F. Lei, L. Li, A. W. M. Chan, L. Xu, Y. Shi, Y. Du, W. Hao, P. K. Wong, J. Wang, S. X. Dou, L. Zhang and J. C. Yu, *J Am Chem Soc*, 2020, **142**, 7036-7046.
13. Y. Han, X. Zhang, W. Cai, H. Zhao, Y. Zhang, Y. Sun, Z. Hu, S. Li, J. Lai and L. Wang, *J Colloid Interf Sci*, 2021, **600**, 620-628.
14. D. Chen, S. Zhang, X. Bu, R. Zhang, Q. Quan, Z. Lai, W. Wang, Y. Meng, D. Yin, S. Yip, C. Liu, C. Zhi and J. C. Ho, *Nano Energy*, 2022, **98**, 107338.
15. M. Jiang, J. Su, X. Song, P. Zhang, M. Zhu, L. Qin, Z. Tie, J. L. Zuo and Z. Jin, *Nano Lett*, 2022, **22**, 2529-2537.
16. Z. Y. Wu, M. Karamad, X. Yong, Q. Huang, D. A. Cullen, P. Zhu, C. Xia, Q. Xiao, M.

- Shakouri, F. Y. Chen, J. Y. T. Kim, Y. Xia, K. Heck, Y. Hu, M. S. Wong, Q. Li, I. Gates, S. Siahrostami and H. Wang, *Nat Commun*, 2021, **12**, 2870.
17. G.-F. Chen, Y. Yuan, H. Jiang, S.-Y. Ren, L.-X. Ding, L. Ma, T. Wu, J. Lu and H. Wang, *Nat Energy*, 2020, **5**, 605-613.
18. Y. Wang, C. Liu, B. Zhang and Y. Yu, *Sci China Mater*, 2020, **63**, 2530-2538.
19. J. Wang, D. Wu, M. Li, X. Wei, X. Yang, M. Shao and M. Gu, *Nano Lett*, 2022, **22**, 5600-5606.
20. Y.-T. Xu, M.-Y. Xie, H. Zhong and Y. Cao, *ACS Catal*, 2022, **12**, 8698-8706.
21. L. Sun and B. Liu, *Adv Mater*, 2023, **35**, 2207.
22. T. Ren, Z. Yu, H. Yu, K. Deng, Z. Wang, X. Li, H. Wang, L. Wang and Y. Xu, *Appl Catal B Environ*, 2022, **318**, 121805.
23. W.-D. Zhang, H. Dong, L. Zhou, H. Xu, H.-R. Wang, X. Yan, Y. Jiang, J. Zhang and Z.-G. Gu, *Appl Catal B Environ*, 2022, **317**, 121750.
24. H. Zhu, S. Dong, X. Du, H. Du, J. Xia, Q. Liu, Y. Luo, H. Guo and T. Li, *Catal Sci Technol*, 2022, **12**, 4998-5002.
25. Q. L. Hong, Z. N. Zhang, X. H. Wang, S. B. Yin, F. Shi, S. N. Li and Y. Chen, *Inorg Chem*, 2022, **61**, 14397-14402.
26. Z. Li, L. Wang, Y. Cai, J.-R. Zhang and W. Zhu, *J Hazard Mater*, 2022, **440**, 129828.
27. Q. Yin, S. Hu, J. Liu and H. Zhou, *Sustain Energ Fuels*, 2022, **6**, 4716-4725.
